# Supplementary material
Source: bioRxiv or medRxiv preprint supplement (https://www.biorxiv.org/highwire/filestream/97727/field_highwire_adjunct_files/0/319020-1.pdf)
Supplement: Supplementary file [file 319020-1.pdf]

# Supplemental Materials

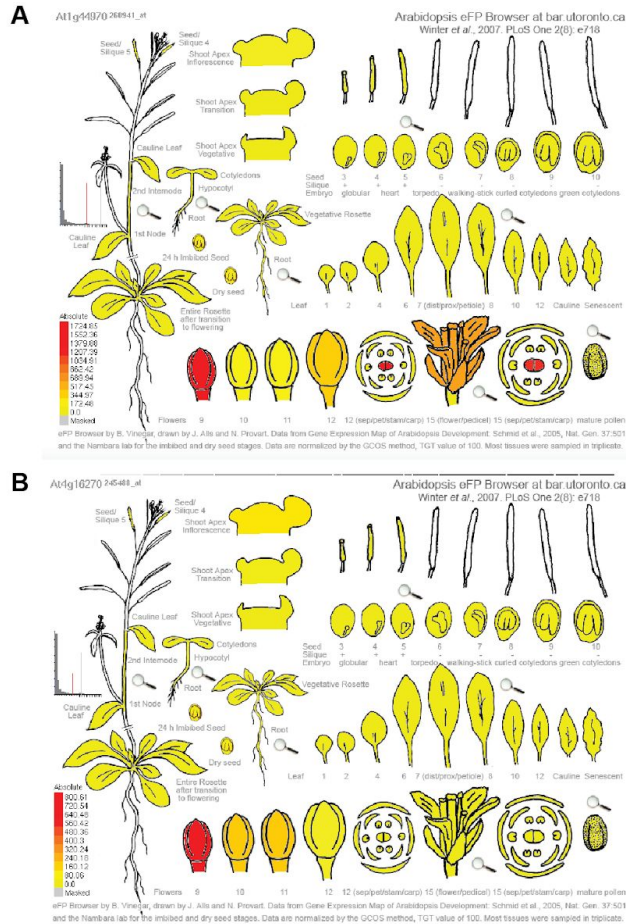

**Supplemental Figure 1.** BAR eFP predicts *PRX9* and *PRX40* are expressed in early flower buds.

Screen shots of Bioanalytic Resource (BAR) electronic fluorescent pictograph (eFP) (<http://bar.utoronto.ca/efp/cgi-bin/efpWeb.cgi>) (Waese and Provart 2017; Winter et al. 2007) expression patterns for *PRX9* (A) and *PRX40* (B). *PRX9* is expressed stage 9 flower buds and stage 12 - 15 carpels. *PRX40* is specifically expressed in stage 9 flower buds.

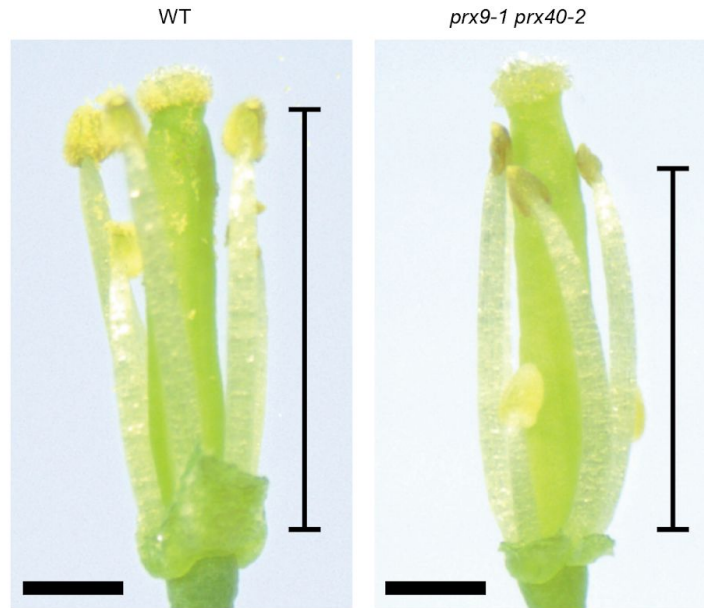

**Supplemental Figure 2.** Anther filaments from stage 14 *prx9-1 prx40-2* flower are not fully elongated.

Petals and sepals were removed from stage 14 wild-type (**Left Panel**) and *prx9-1 prx40-2* (**Right Panel**) flowers. Anther filaments from *prx9-1 prx40-2* flowers were shorter than those of wild-type flowers, indicated by the t-bars. Bars = 500 nm.

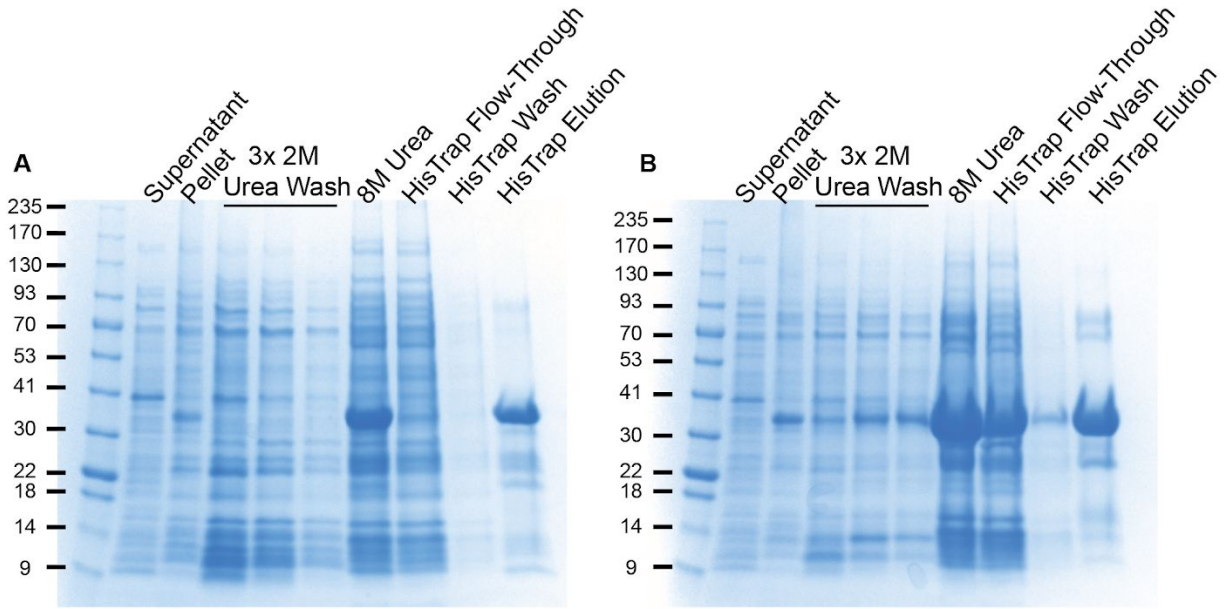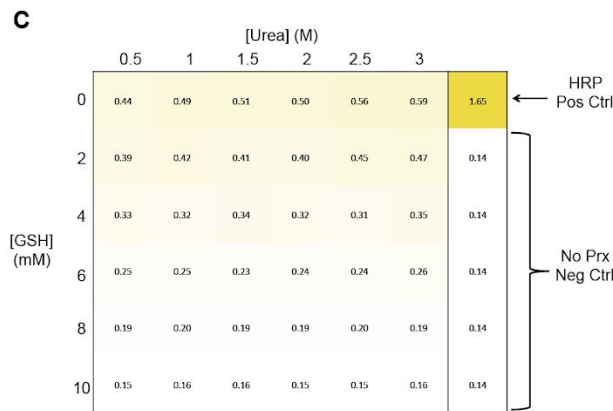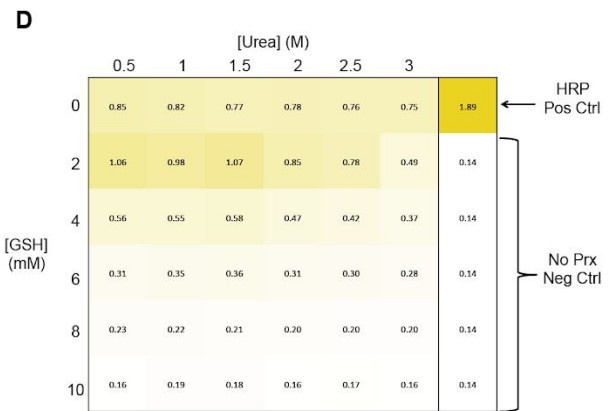

**Supplemental Figure 3.** Reconstituted enzyme activity can be obtained by solubilizing, purifying, and refolding protein from *E. coli* expressing PRX9 and PRX40.

Example SDS-PAGE gels visualizing steps in the purification of PRX9 (**A**) and PRX40 (**B**) by coomassie staining. Results from PRX9 (**C**) and PRX40 (**D**) refolding optimization. Refolding conditions were assayed in plate format and activity was determined by measuring the absorbance of the reactions at 420 nm with a plate reader. The absorbance in each condition is indicated by the color of the cells and by the number in the cells of the matrix. The top right cell is a positive control which used horseradish peroxidase. The remaining cells in the right-most columns were negative controls in which no peroxidase was added.

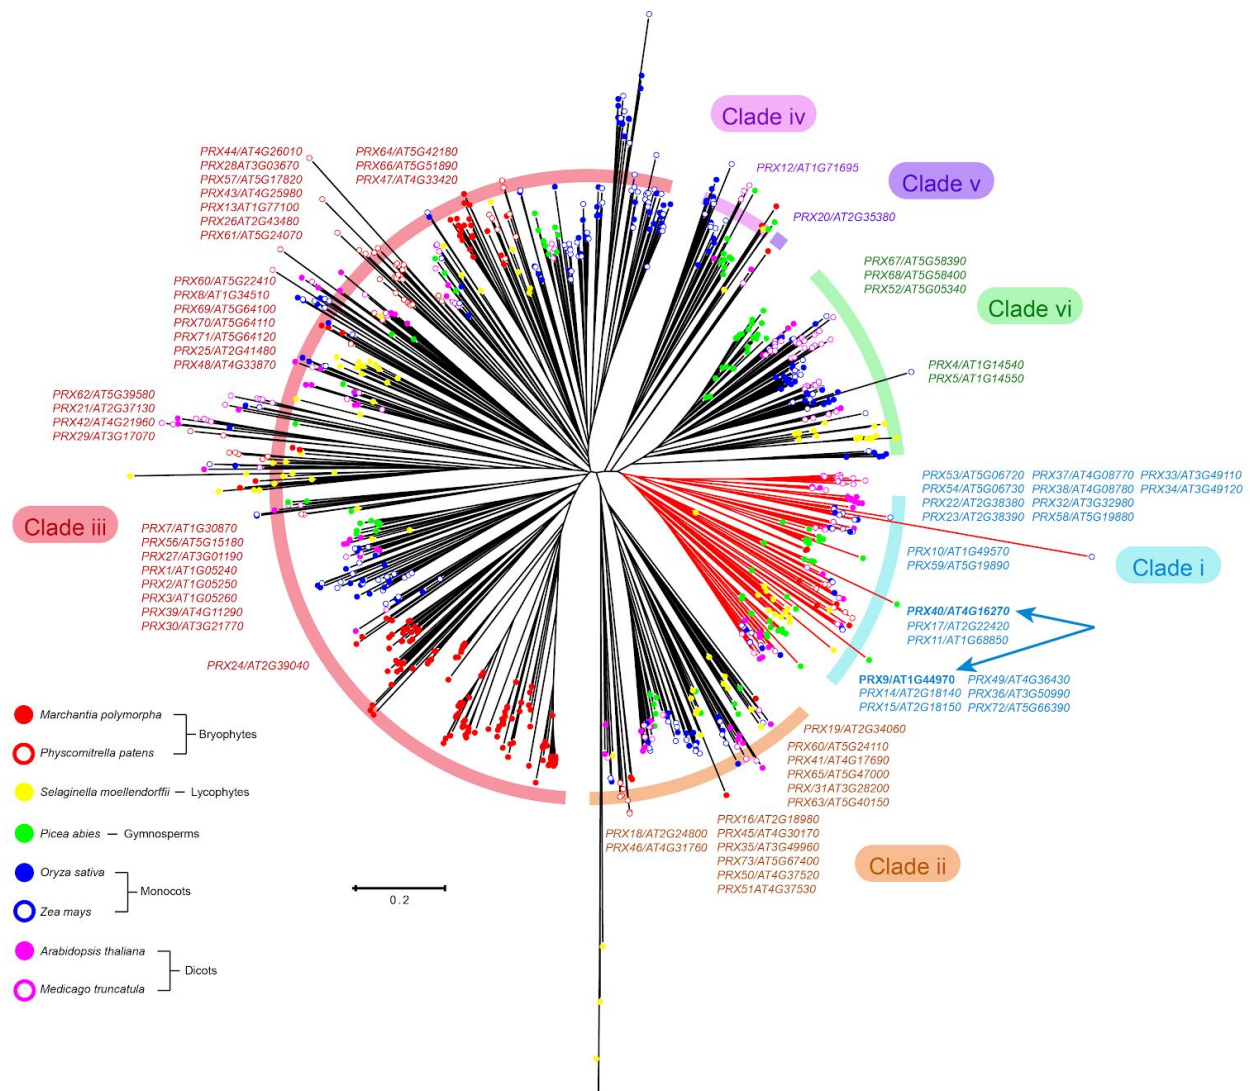

**Supplemental Figure 4.** Neighbor-joining phylogenetic analysis of class III peroxidases across land plants.

887 class III peroxidase protein sequences were collected, aligned, and used to produce a neighbor-joining tree with 500 bootstrap replications. The scale measures evolutionary distance in substitutions per amino acid. 6 distinct clades are seen in the phylogeny: clades i - vi. These clades are highlighted by various colors and the approximate locations of the 73 *Arabidopsis* class III peroxidases are placed around the phylogeny. PRX9 and PRX40 are placed in clade i, which have branches highlighted in red. PRX9 and PRX40 labels are bolded and indicated by blue arrows.

**Supplementary Table 1.** List of primers used in this study.

| <b>Name</b> | <b>Sequence</b>                                              | <b>Used For</b>                                |
|-------------|--------------------------------------------------------------|------------------------------------------------|
| JRJ0489F    | ATGGCTATCTCAAAGCTTATTCCTACTC                                 | PRX9 RT-PCR (Forward)                          |
| JRJ0490R    | TTAGTTAATCACATGACAACCTTCCTCTG                                | PRX9 RT-PCR (Reverse)                          |
| JRJ0491F    | ATGTTAAAACCTCAGAAGAAAGTGGAGTG                                | PRX40 RT-PCR (Forward)                         |
| JRJ0492R    | TTAGTTAATCATTCTACAATTCTTCCTAATCTC                            | PRX40 RT-PCR (Reverse)                         |
| JRJ0497F    | CGTACAACCGGTATTGTGCTG                                        | ACTIN2 RT-PCR (Forward)                        |
| JRJ0498R    | GAAACATTTTCTGTGAACGATTCC                                     | ACTIN2 RT-PCR (Reverse)                        |
| JRJ0187F    | CATGATTACGCCAAGCTTTCTAGAGAAAATTTTGTAGCAT<br>TGAAACAAGC       | proPRX9 Cloning for GUS reporter<br>(Forward)  |
| JRJ0188R    | AACATAAGGGACTGACCTACCCGGGTTTTGTTACTTGGGA<br>GTTTTAAGATGAG    | proPRX9 Cloning for GUS reporter<br>(Reverse)  |
| JRJ0193F    | CATGATTACGCCAAGCTTTCTAGAGAGAGGTCAAGCTCTA<br>GTAAAGACTAAAGACT | proPRX40 Cloning for GUS reporter<br>(Forward) |
| JRJ0194R    | AACATAAGGGACTGACCTACCCGGGTCAATGGAGTTGGTA<br>CTATATTAGAAAGCTA | proPRX40 Cloning for GUS reporter<br>(Reverse) |
| JRJ0191F    | GAAAACCTTGTACTTCCAGGCCCATGGCCATCCAGGTCTAG<br>GATTTGGATG      | PRX9 pHis8-4 Gibson Cloning<br>(Forward)       |
| JRJ0192R    | CTCGAATTCGGATCCGCCATGGTTAGTTAATCACATGACA<br>ACTCTTCCTG       | PRX9 pHis8-4 Gibson Cloning<br>(Reverse)       |
| JRJ0197F    | GAAAACCTTGTACTTCCAGGCCCATGGCGAGAATCCAACCA<br>ATTTCAAGC       | PRX40 pHis8-4 Gibson Cloning<br>(Forward)      |
| JRJ0198R    | CTCGAATTCGGATCCGCCATGGTTAGTTAATCATTCTACAA<br>TTCTTCCTAATCTC  | PRX40 pHis8-4 Gibson Cloning<br>(Reverse)      |
| JRJ0019LP   | TACTACCACCGGTATCCCTC                                         | prx40-1 SALK_031680 Genotyping LP              |
| JRJ0020RP   | CACGGTGTTAGAGGATCCAAG                                        | prx40-1 SALK_031680 Genotyping RP              |
| JRJ0021LP   | GAGCTGTAAACGAAGTGCACC                                        | prx40-2_SALK_061827 Genotyping LP              |
| JRJ0022RP   | TTCCTTATGTTTTTCTTTGCAATG                                     | prx40-2_SALK_061827 Genotyping RP              |
| JRJ0219RP   | GTTTTAAGAAACCGGTCTCGG                                        | prx9-1 SALK_204557C Genotyping RP              |
| JRJ0220LP   | GAAGTTAGGCACATGGATTCCG                                       | prx9-1 SALK_204557C Genotyping LP              |
| JRJ0221RP   | TCCAACGTAAAGGTTTGAACG                                        | prx9-2 SAIL_875_A09 Genotyping RP              |
| JRJ0222LP   | TTTGCTTTTTCTTAAATCCGC                                        | prx9-2 SAIL_875_A09 Genotyping LP              |
| SALK_LBb1.3 | ATTTTGCCGATTTCCGGAAC                                         | SALK Line Genotyping BP                        |
| SAIL_LB1    | GCCTTTTCAGAAATGGATAAATAGCCTTGCTTCC                           | SAIL Line Genotyping BP                        |

|           |                         |                             |
|-----------|-------------------------|-----------------------------|
| 114r      | CCAACGCTGATCAATTCCAC    | CSHL GeneTrap Genotyping BP |
| JRJ0556LP | TGGTGGAGGAGGCGACTT      | GT8324 Genotyping LP        |
| 12f       | ACCATACCAGTTGCAGTGATGAC | GT8324 Genotyping RP        |



## Supplemental Figure Legends

**Supplemental Figure 1.** BAR eFP predicts *PRX9* and *PRX40* are expressed in early flower buds.

Screen shots of Bioanalytic Resource (BAR) electronic fluorescent pictograph (eFP) (<http://bar.utoronto.ca/efp/cgi-bin/efpWeb.cgi>) (Waese and Provart 2017; Winter et al. 2007) expression patterns for *PRX9* (A) and *PRX40* (B). *PRX9* is expressed stage 9 flower buds and stage 12 - 15 carpels. *PRX40* is specifically expressed in stage 9 flower buds.

**Supplemental Figure 2.** Anther filaments from stage 14 *prx9-1 prx40-2* flower are not fully elongated.

Petals and sepals were removed from stage 14 wild-type (Left Panel) and *prx9-1 prx40-2* (Right Panel) flowers. Anther filaments from *prx9-1 prx40-2* flowers were shorter than those of wild-type flowers, indicated by the t-bars. Bars = 500 nm.

**Supplemental Figure 3.** Reconstituted enzyme activity can be obtained by solubilizing, purifying, and refolding protein from *E. coli* expressing *PRX9* and *PRX40*.

Example SDS-PAGE gels visualizing steps in the purification of *PRX9* (A) and *PRX40* (B) by coomassie staining. Results from *PRX9* (C) and *PRX40* (D) refolding optimization. Refolding conditions were assayed in plate format and activity was determined by measuring the absorbance of the reactions at 420 nm with a plate reader. The absorbance in each condition is indicated by the color of the cells and by the number in the cells of the matrix. The top right cell is a positive control which used horseradish peroxidase. The remaining cells in the right-most columns were negative controls in which no peroxidase was added.

**Supplemental Figure 4.** Neighbor-joining phylogenetic analysis of class III peroxidases across land plants.

887 class III peroxidase protein sequences were collected, aligned, and used to produce a neighbor-joining tree with 500 bootstrap replications. The scale measures evolutionary distance in substitutions per amino acid. 6 distinct clades are seen in the phylogeny: clades i - vi. These clades are highlighted by various colors and the approximate locations of the 73 *Arabidopsis* class III peroxidases are placed around the phylogeny. PRX9 and PRX40 are placed in clade i, which have branches highlighted in red. PRX9 and PRX40 labels are bolded and indicated by blue arrows.
